# Supplementary material
Source: PubMed Central journal article supplement (PMC7441782)
Supplement: TBSD_A_1796802_SM0776.pdf [file TBSD_A_1796802_SM0776.pdf]

# Dual Inhibitors of SARS-CoV-2 proteases: Pharmacophore and molecular dynamics based drug repositioning and phytochemical leads.

Kartik Mitra<sup>1</sup>, Prasanth Ghanta<sup>2</sup>, Sushank Acharya<sup>1</sup>, Gayathri Chakrapani<sup>1</sup>, Basavaraju Ramaiah<sup>2</sup> and Mukesh Doble<sup>1\*</sup>

<sup>1</sup> Bio-engineering and drug design lab , Department of Biotechnology, Bhupat and Jyoti Mehta School of Biosciences ,Indian Institute of Technology -madras, Adayar, Chennai-600036.

<sup>2</sup> Department of Biosciences, Sri Sathya Sai Institute of Higher Learning, Prashanthi nilayam, Puttaparthi – 515134.

\*<sup>1</sup> Mukesh Doble: mukeshd@iitm.ac.in

## Supplementary files.

**Table.1:** Set-1 = reported SARs-CoV 3CL-proteases inhibitors with their binding scores and pharmacophoric similarity with respect to pharmacophore model -1 (Ph-1).

| Name          | Structure                                                                           | IC <sub>50</sub> | - ΔG <sub>b</sub> (Kcal /mol) | Similarity / Ph-1 |
|---------------|-------------------------------------------------------------------------------------|------------------|-------------------------------|-------------------|
| Amentoflavone | 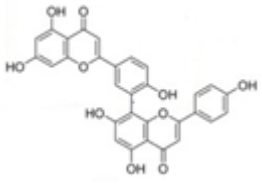 | 8.3±0.5          | -9.4                          | 0.690             |
| luteolin      |  | 20.2             | -7.4                          | 0.517             |
| savinin       |  | 25               | -7.7                          | 0.422             |

|                   |                                                                                     |           |      |       |
|-------------------|-------------------------------------------------------------------------------------|-----------|------|-------|
| Isatin derivative | 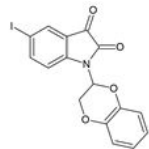   | 13.5      | -7.3 | 0.433 |
| Synthetic         |    | 7.3±0.7   | -6.9 | 0.387 |
| 48511             |    | 3.3±0.3   | -7.4 | 0.404 |
| DC060251          |    | 9.56±1.8  | -8.4 | 0.535 |
| DC060170          |   | 6.86±0.91 | -8.8 | 0.561 |
| MAC-5576          |  | 0.5       | -6.8 | 0.343 |
| Hexachlorophene   |  | 5         | -6.1 | 0.283 |
| Compound- 2N      |  | 5.5       | -8.0 | 0.156 |

|                        |                                                                                   |      |      |       |
|------------------------|-----------------------------------------------------------------------------------|------|------|-------|
| Compund -4             | 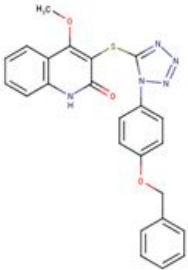 | 2.0  | -8.7 | 0.628 |
| Di - hydrotanshinone I |  | 14.4 | -8.1 | 0.637 |
| Isatin derivative      |  | 0.98 | -6.8 | 0.213 |

**Table:2.** Reported PLP inhibitors used for developing pharmacophore model -2 ( Ph-2), along with their binding score and molecular similarity with Ph-2 model.

| Name               | Structure                                                                           | IC 50          | - $\Delta G_b$ (Kcal /mol) | Similarity / Ph-1 | Ref                |
|--------------------|-------------------------------------------------------------------------------------|----------------|----------------------------|-------------------|--------------------|
| Bavachinin         | 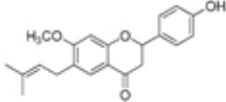 | $38.4 \pm 2.4$ | -7.9                       | 0.591             | (Kim et al., 2014) |
| Neobavaisoflavone  |  | $18.3 \pm 1.1$ | -7.8                       | 0.567             |                    |
| Isobavachalcone    |  | $7.3 \pm 0.8$  | -8.2                       | 0.691             |                    |
| Methylbavachalcone |  | $10.1 \pm 1.2$ | -8.6                       | 0.658             |                    |

|                            |                                                                                     |                |      |       |                     |
|----------------------------|-------------------------------------------------------------------------------------|----------------|------|-------|---------------------|
| Psoralidin                 | 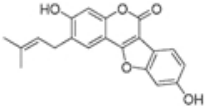   | $4.2 \pm 1.0$  | -8.3 | 0.601 |                     |
| corylifol A                |    | $32.3 \pm 3.2$ | -8.4 | 0.640 |                     |
| Tormentin- B               |    | $6.1 \pm 0.02$ | -8.7 | 0.684 | (Cho et al., 2013)  |
| N-trans-feruloyloctopamine |    | $26.6 \pm 0.5$ | -7.1 | 0.503 |                     |
| papyriflavonol A           |    | $3.7 \pm 1.6$  | -8.3 | 0.642 | (Song et al., 2014) |
| brousochalcone B           |  | $11.6 \pm 0.7$ | -8.5 | 0.655 | (Kim et al., 2014)  |
| Tanshinone-I               |  | $11.5 \pm 1.5$ | -8.3 | 0.651 | (Park et al., 2012) |
| hirsutenone                |  | $4.1 \pm 0.3$  | -7.7 | 0.513 |                     |
| Curcumin                   |  | $5.7 \pm 0.3$  | -7.3 | 0.550 |                     |

|                 |                                                                                   |          |      |       |                            |
|-----------------|-----------------------------------------------------------------------------------|----------|------|-------|----------------------------|
| xanthoangelol E | 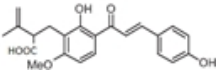 | 1.2±0.5  | -7.7 | 0.539 | (Park et al., 2016)        |
| xanthoangelol F |  | 5.6±0.5  | -8.0 | 0.634 |                            |
| Compound -6     |  | 2.6±0.1  | -8.7 | 0.713 | (Báez-Santos et al., 2014) |
| Compound -5g    |  | 0.67±0.1 | -9.3 | 0.763 |                            |

**Figure : 1**

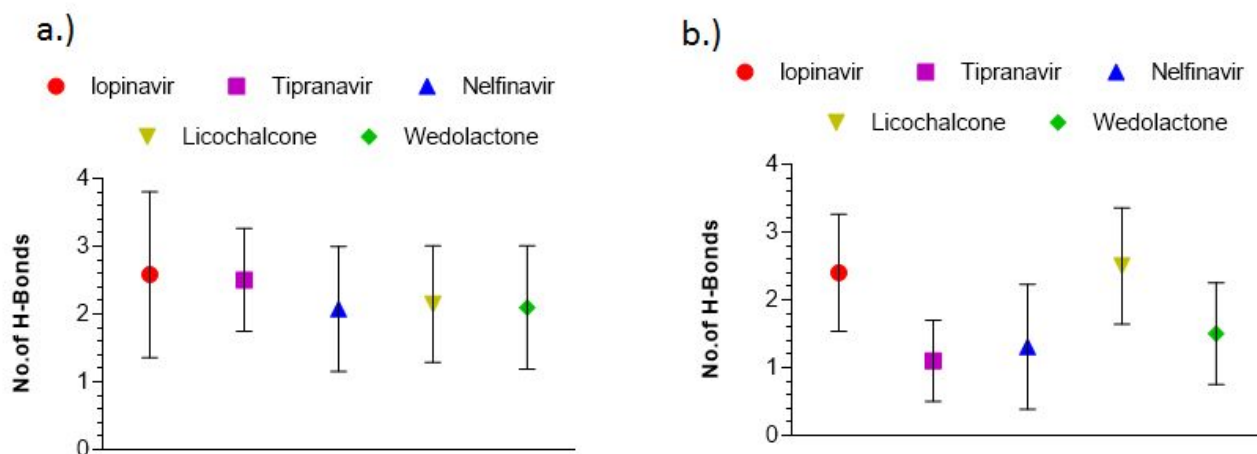

**Fig.1.:** H-bond analysis of complexes throughout the trajectory, a.) 3CLp complex , b.) PLp complexes. In case of 3CLp Lopinavir was showing very high variation in H-bonds due to its unstable binding.

**Figure : 2**

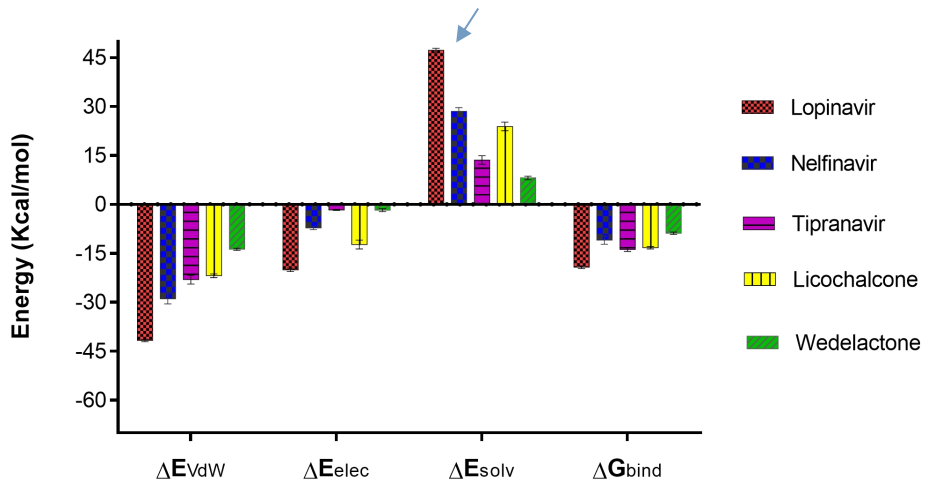

**Fig:2.** MM/PBSA - Energy Decomposition analysis of PLp complexes.

**Figure : 3**

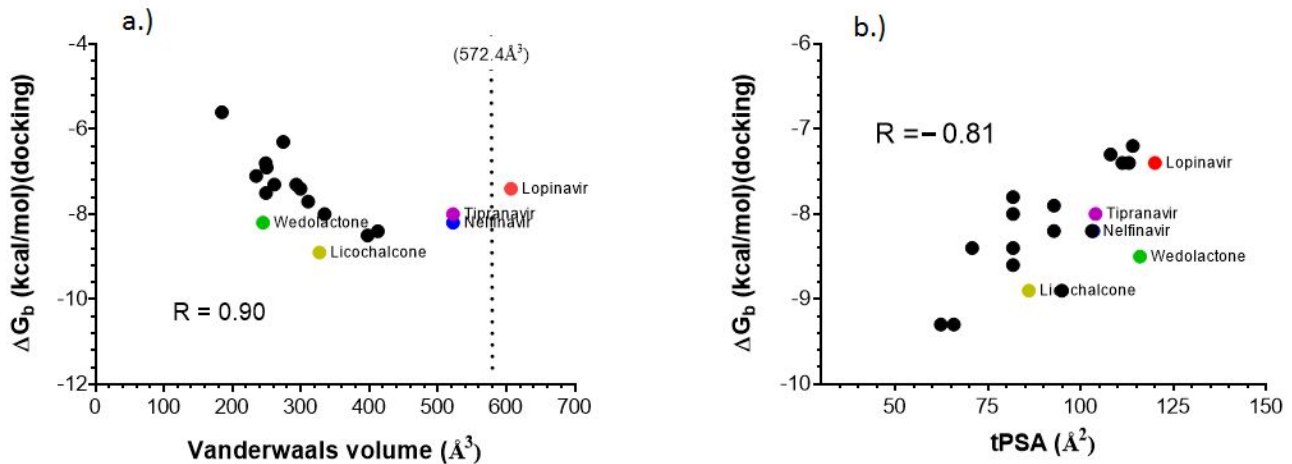

**Fig:3.a.)** The plot indicates the relationship between vanderwaal volume of reported 3CLp inhibitors and their binding energy ( $R=0.90$ ). The dotted line indicates the active site pocket volume of 3CLP =  $572.4 \text{\AA}^3$  as cut-off; **b.)** The plot indicates the relationship between total polar surface of reported PLp inhibitors and their binding energy ( $R=0.81$ ). Coloured points indicate binding energies estimated from MD simulation and black points indicate binding energies estimated from docking.

Figure : 4

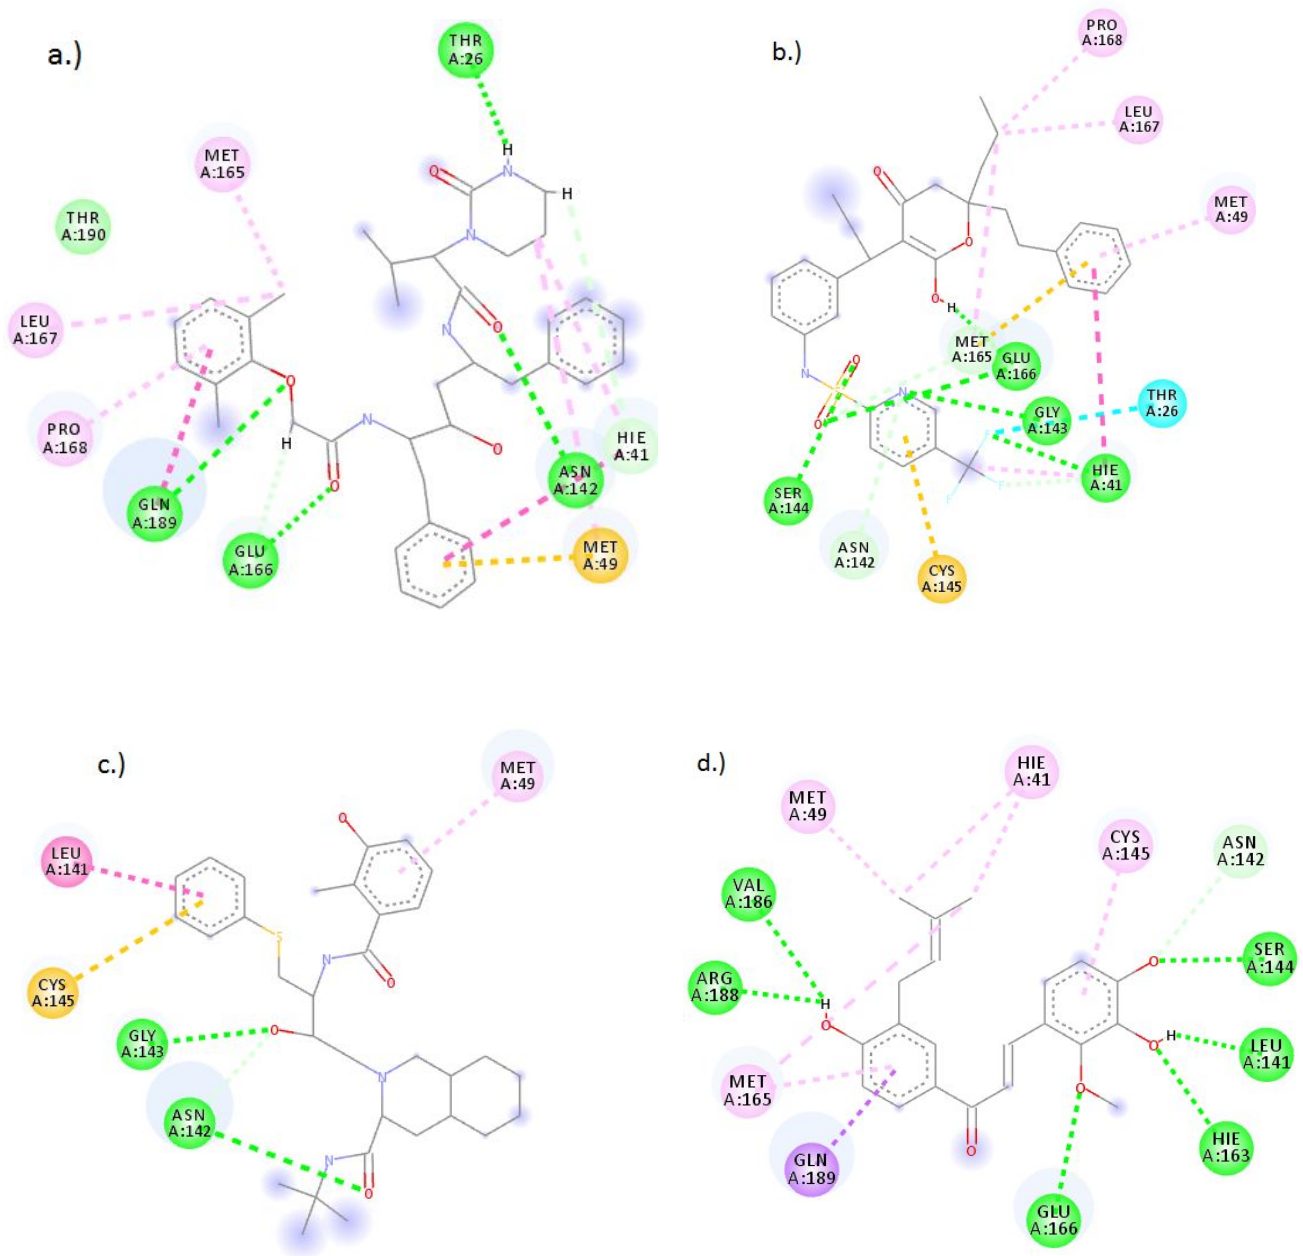

Fig:4. Interaction plot of 3CLp complexes after 30ns simulation a.)Lopinavir , b.)Tipranavir , c.)Nelfinavir, d.)Licochalcone-D and e.) Wedelolactone.

**Figure 5:**

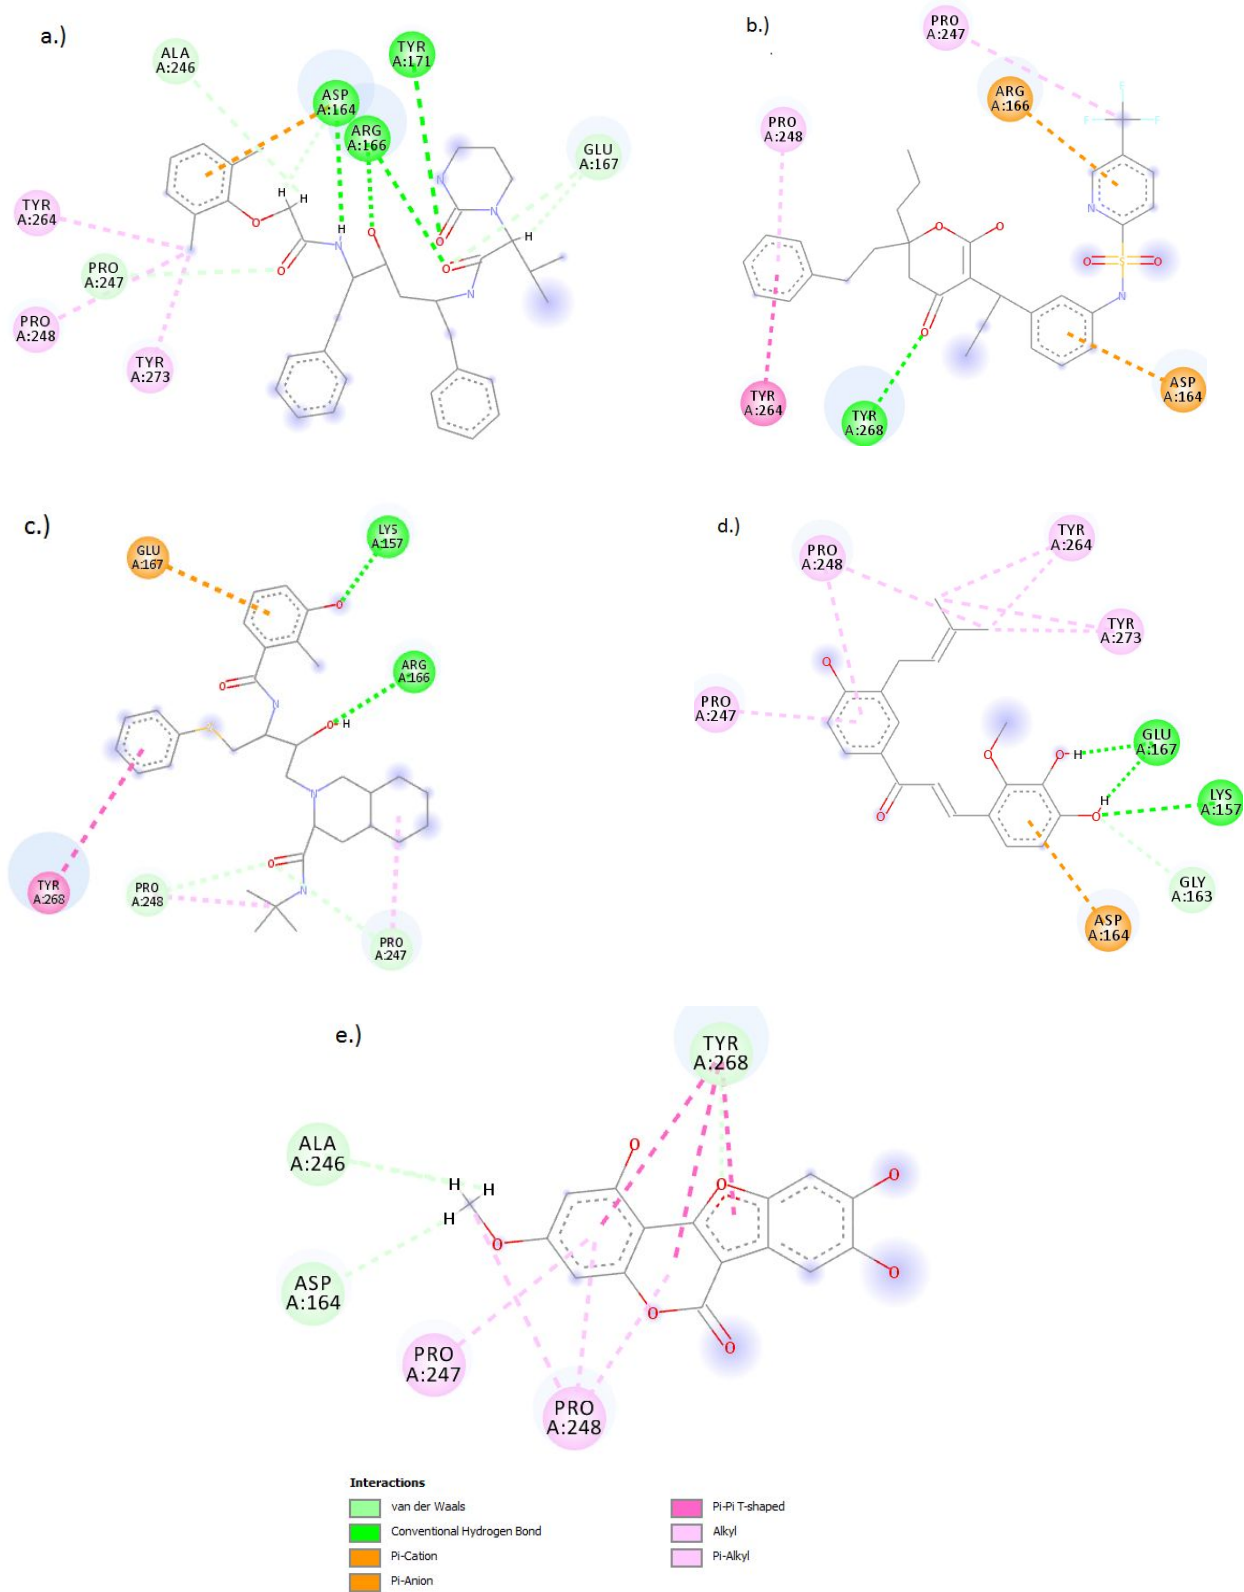

Fig:5. Interaction plot of PLp complexes after 30ns simulation a.)Lopinavir , b.)Tipranavir , c.)Nelfinavir, d.)Licochalcone-D and e.) Wedelolactone.
